# Supplementary material
Source: publisher site journal article supplement (https://www.dovepress.com/article/463067)
Supplement: Supplementary file 1 [file get_supplementary_file.php]

Table S1 Identification of chemical components in ZXT extracts by UPLC-QE-Qrbitrap-MS

| **No.** | **TR** | **Identification** | **Formula** | **Measured weight** | **Molecular weight** | **MS/MS data (m/z)** | **Ion modes** | **Belong** |
| --- | --- | --- | --- | --- | --- | --- | --- | --- |
| **(min)** |
| 1 | 1.43 | 3-Benzylxanthine | C12H10N4O2 | 243.1001 | 242.0804 | 198.1878,170.0292,103.2482 | [M+H]+ | DL |
| 2 | 2.53 | Tryptophan | C11H12N2O2 | 204.9592 | 204.0898 | 205.0999,188.0730,159.0937,146.0619 | [M+H]+ | ZSZ |
| 3 | 2.55 | Uracil | C4H4N2O2 | 113.9651 | 112.0971 | 96.0460,70.0669 | [M+H]+ | DL |
| 4 | 2.61 | Proline | C5H9NO2 | 116.0721 | 115.1305 | 98.0982,70.0668 | [M+H]+ | DL |
| 5 | 3.19 | 6-C-Glucosyl-8-C-arabinosylchrysin | C26H28O13 | 546.1034 | 547.1453 | 225.0721 | [M-H]- | HQ |
| 6 | 3.25 | Leucine | C6H13NO2 | 132.0672 | 131.0946 | 86.0981,69.0715 | [M+H]+ | DL |
| 7 | 3.34 | Adenosine | C10H13N5O4 | 268.0843 | 267.2413 | 136.0636 | [M+H]+ | DL |
| 8 | 3.52 | Glutamic acid | C5H9NO4 | 148.0201 | 147.1293 | 130.0880,102.0566,86.0617 | [M+H]+ | DL |
| 9 | 3.69 | 3-Methyl-2,6-dioxo-4-hexenoic acid | C7H8O4 | 157.0852 | 156.0423 | 141.0022,113.9654,84.9613 | [M+H]+ | DL |
| 10 | 4.82 | liquiritin | C21H22O9 | 417.2241 | 418.1263 | 236.1046,213.2059,236.1046,119.9459,93.0335 | [M-H]- | KXR |
| 11 | 5.03 | Phthalic acid | C8H6O4 | 167.0151 | 166.1324 | 149.0251,105.4936 | [M+H]+ | KXR |
| 12 | 6.21 | Myristicin | C11H12O3 | 193.1567 | 192.2186 | 193.0043,165.0089,147.0308,133.9310 | [M+H]+ | ZSZ |
| 13 | 6.74 | 3,4-dihydroxyphenylpropionic acid | C9H10O4 | 182.9869 | 182.1733 | 147.0460,137.0809,95.0510 | [M+H]+ | ZSZ |
| 14 | 6.93 | Chlorogenic acid | C16H18O9 | 353.0708 | 354.3128 | 191.9461,179.1070,135.0812 | [M-H]- | KXR |
| 15 | 7.25 | Protocatechualdehyde | C7H6O3 | 139.0192 | 138.039 | 121.0414,111.0820 | [M+H]+ | ZSZ |
| 16 | 7.57 | Glu-Leu | C11H20N2O5 | 261.0397 | 260.1445 | 201.2071,145.1433,130.1247,129.1485 | [M+H]+ | ZSZ |
| 17 | 8.18 | isobricenone | C10H12O2 | 165.0563 | 164.091 | 165.0566,147.0459,137.0618,123.0459,107.2889 | [M+H]+ | ZSZ |
| 18 | 8.92 | Glutamylphenylalanine | C14H18N2O5 | 295.1532 | 294.1215 | 232.0995,186.0937,166.0884,120.0826 | [M+H]+ | DL |
| 19 | 9.25 | Mannitol | C6H14O6 | 205.1006 | 182.1736 | 188.073 | [M+Na]+ | QH |
| 20 | 9.32 | Leu-Leu | C12H22N2O2 | 227.1777 | 226.1754 | 227.0818 | [M+H]+ | ZSZ |
| 21 | 9.85 | Perillyl alcohol | C10H16O | 153.0423 | 152.1201 | 136.0410,92.0511,79.01944,69.0350 | [M+H]+ | ZSZ |
| 22 | 10.04 | Tectoridin | C22H22O11 | 461.1451 | 462.4517 | 162.0845 | [M-H]- | SG |
| 23 | 10.62 | Succinic acid | C4H6O4 | 118.9441 | 118.0266 | 101.0852,73.0858 | [M+H]+ | DL |
| 24 | 11.25 | p-Cymene | C10H14 | 135.0043 | 134.1095 | 93.0717,91.0558,79.0193,53.9289 | [M+H]+ | ZSZ |
| 25 | 12.08 | Ferulic Acid | C10H10O4 | 195.1123 | 194.0579 | 177.1020,119.9530,89.0612 | [M+H]+ | CX |
| 26 | 12.13 | Luteolin-7-O-β-D-rutinoside | C27H30O15 | 593.1521 | 594.1512 | 447.0943、285.0412 | [M-H]- | HQ |
| 27 | 12.57 | Leu-Phe | C15H22N2O3 | 279.1617 | 278.163 | 201.9251,149.0253,120.0825 | [M+H]+ | DL |
| 28 | 13.14 | robustine | C12H10NO3 | 216.1364 | 215.2142 | 216.1368, 201.1075, 160.0248, 117.0721 | [M+H]+ | BXP |
| 29 | 14.32 | Mandelonitrile | C8H7NO | 134.0406 | 133.1562 | 106.0669,78.0559 | [M+H]+ | KXR |
| 30 | 14.64 | catechin | C15H14O6 | 289.1437 | 290.2681 | 271.2285,179.0342 | [M-H]- | KXR |
| 31 | 14.81 | Baicalin | C21H18O11 | 447.0968 | 446.0896 | 271.0635 | [M+H]+ | HQ |
| 32 | 15.03 | chelidonine | C20H19NO5 | 352.0633 | 353.1263 | 336.2233,304.9679,135.0805 | [M-H]- | BQC |
| 33 | 15.03 | 4-Hydroxy-3-butylphthalide | C12H14O3 | 207.2226 | 206.2413 | 189.1049,161.1093,130.0509 | [M+H]+ | CX |
| 34 | 15.21 | Oroxyloside | C22H20O11 | 459.0931 | 460.3134 | 283.2094,241.2179,197.0382 | [M-H]- | HQ |
| 35 | 15.57 | Ligustrazine | C8H12N2 | 135.0291 | 136.1943 | 119.0914,68.2394 | [M-H]- | CX |
| 36 | 15.83 | (S)-Stylopine | C19H17NO4 | 324.1586 | 323.1157 | 307.1523,295.1653,238.1656,149.0980 | [M+H]+ | BQC |
| 37 | 17.12 | isoavroside | C21H20O10 | 431.1848 | 432.3813 | 341.3068,323.2959,311.1691 | [M-H]- | SG |
| 38 | 17.23 | Irisflorentine | C20H18O8 | 387.1967 | 386.3514 | 297.1631 | [M+H]+ | SG |
| 39 | 17.52 | limonin | C26H30O8 | 471.3588 | 470.5123 | 453.3349, 383.2735, 161.0945 | [M+H]+ | BXP |
| 40 | 17.73 | Phellopterin | C17H16O5 | 301.1438 | 300.3314 | 218.0136,162.0778,134.0878 | [M+H]+ | QH |
| 41 | 18.03 | 6-Methoxynaringenin | C16H14O6 | 303.0591 | 302.0708 | 303.2359、285.2250、183.1193、169.1032 | [M+H]+ | HQ |
| 42 | 18.32 | Isopteleine | C13H11NO3 | 230.1521 | 229.2315 | 215.0960,187.1421,174.1023,159.0323 | [M+H]+ | BXP |
| 43 | 20.03 | Obacunone | C26H30O7 | 453.2538 | 454.1991 | 407.2456,383.3540,219.9466,97.9300 | [M-H]- | BXP |
| 44 | 20.04 | Praeruptorin A | C21H22O7 | 404.1698 | 386.4312 | 327.1348,227.1406 | [M+NH4]+ | QH |
| 45 | 20.46 | Wogonoside | C22H20O11 | 459.1956 | 460.0936 | 267.1971、174.9555、112.9845 | [M-H]- | HQ |
| 46 | 21.13 | Senkyunolide I | C12H16O4 | 247.0036 | 224.2515 | 207.6741 | [M+Na]+ | CX |
| 47 | 21.17 | Ligustilide | C12H16O3 | 209.0448 | 208.1099 | 191.0678,135.0774 | [M+H]+ | CX |
| 48 | 21.71 | Methyleugenol | C11H14O2 | 179.0808 | 178.2277 | 179.0814,163.0624,121.0300,103.0407 | [M+H]+ | ZSZ |
| 49 | 22.31 | isoimperatorin | C16H14O4 | 271.0037 | 270.2819 | 203.0551 | [M+H]+ | QH |
| 50 | 22.51 | beta-Sitosterol | C29H50O | 415.7259 | 414.3861 | 387.2048,301.1176,213.1072,85.0981 | [M+H]+ | CX |
| 51 | 23.61 | Dihydrocapsaicin | C18H29NO3 | 306.0587 | 307.4278 | 233.9776,170.9603,136.9089,111.0077 | [M-H]- | DL |
| 52 | 24.71 | Skimmianin | C14H13NO4 | 260.2609 | 259.0844 | 244.1442,198.2245,156.6745 | [M+H]+ | BXP |
| 53 | 25.23 | Norsanguinarine | C19H11NO4 | 316.0422 | 317.0688 | 288.0329,258.0084 | [M-H]- | BQC |
| 54 | 25.76 | Dihydrochelerythrine | C21H19NO4 | 350.1212 | 349.1314 | 334.0586,287.9249,238.0834,214.0498,204.1060 | [M+H]+ | BQC |
| 55 | 25.81 | Sanguinarine | C20H14NO4 | 333.134 | 332.3295 | 333.2552,274.2437 | [M+H]+ | BQC |
| 56 | 26.79 | Terephthalaldehyde | C15H12O4 | 135.0043 | 134.1372 | 107.0872,79.0195 | [M+H]+ | KXR |
| 57 | 26.83 | 5,8,11-Neptadecatrien-1-ol | C17H30O | 251.178 | 250.2297 | 251.0694,233.0592,177.0685,163.0615,135.0653 | [M+H]+ | DL |
| 58 | 27.12 | dictamnine | C12H10NO2 | 200.0712 | 199.2146 | 185.0851,156.9844,129.0564,102.0566 | [M+H]+ | BQC |
| 59 | 27.83 | Chelerythrine | C21H18NO4 | 348.293 | 348.3719 | 290.1305,260.2701 | [M+H]+ | BQC |
| 60 | 28.2 | Butylidenephthalide | C12H12O2 | 189.0889 | 188.2234 | 171.0780,153.0677,128.0723 | [M+H]+ | CX |
| 61 | 28.25 | n-butylphthalide | C12H14O2 | 191.0788 | 190.2418 | 173.0452,145.4695 | [M+H]+ | CX |
| 62 | 29.61 | Xanthoxylin | C12H8O4 | 217.0987 | 196.2416 | 202.0891,177.9685 | [M+H]+ | QH |
| 63 | 29.87 | Myristic acid | C14H28O2 | 229.0608 | 228.2089 | 145.9560,131.2079,117.9609 | [M+H]+ | DL |
| 64 | 29.91 | Fraxinellone | C14H16O3 | 233.0441 | 232.2713 | 215.0954,187.0519 | [M+H]+ | BXP |
| 65 | 30.03 | Praeruptorin E | C24H28O7 | 448.2319 | 428.3387 | 329.1611,245.1312 | [M+NH4]+ | QH |
| 66 | 30.13 | Neprotine | C20H19NO4 | 338.3448 | 337.1308 | 323.2393,308.3227,279.7229 | [M+H]+ | BQC |
| 67 | 31.25 | Arachidonic acid | C20H32O2 | 303.0341 | 304.2406 | 285.2233,259.2436,163.0750,83.0491,59.0125 | [M-H]- | DL |
| 68 | 36.97 | Levistilide A | C24H28O4 | 398.2364 | 380.4825 | 398.2369,149.0252 | [M+NH4]+ | CX |
| 69 | 37.8 | Gallic acid | C7H6O5 | 171.1149 | 170.1241 | 153.0929,125.1089,111.0826,95.0870 | [M+H]+ | KXR |
| 70 | 38.11 | Pentadecanoic acid | C15H30O2 | 243.1591 | 242.2246 | 130.9684,125.5091,117.0563 | [M+H]+ | DL |
| 71 | 39.1 | dehydroabietadienol | C20H30O | 287.8915 | 286.2297 | 243.8790,203.0551 | [M+H]+ | DL |
| 72 | 42.34 | 11,14-eicosadienoic acid | C20H36O2 | 307.2651 | 308.2723 | 261.0083,171.1133,167.0343,127.1231 | [M-H]- | KXR |
| 73 | 42.93 | Linoleic acid | C18H32O2 | 281.2501 | 280.4455 | 221.1424,165.1156,149.0252 | [M+H]+ | DL |
| 74 | 43.05 | Oleic acid | C18H34O2 | 283.0953 | 282.4614 | 265.1199,152.0339,125.0015,98.9861 | [M+H]+ | DL |
| 75 | 44.62 | palmitic acid | C16H32O2 | 257.0832 | 256.2402 | 228.1749,212.1657,158.0288 | [M+H]+ | DL |
